# Supplementary material for: Foliar Fertilization by the Sol-Gel Particles Containing Cu and Zn
Source: MDPI journal article supplement (doi:10.3390/nano13010165), 2022-12-30

# Foliar Fertilization by the Sol-Gel Particles Containing Cu and Zn

Beata Borak <sup>1,\*</sup>, Krzysztof Gediga <sup>2</sup>, Urszula Piszcz <sup>2</sup> and Elżbieta Sacała <sup>2</sup>

<sup>1</sup> Department of Mechanics, Materials and Biomedical Engineering, Faculty of Mechanical Engineering, Wrocław University of Science and Technology, Smoluchowskiego Str. 25, 50-370 Wrocław, Poland

<sup>2</sup> Department of Plant Nutrition, Institute of Soil Science, Plant Nutrition and Environmental Protection, The Faculty of Life Sciences and Technology, Grunwaldzka Str. 53, 50-357 Wrocław, Poland

\* Correspondence: beata.borak@pwr.edu.pl

Figure S1. DLS measurements

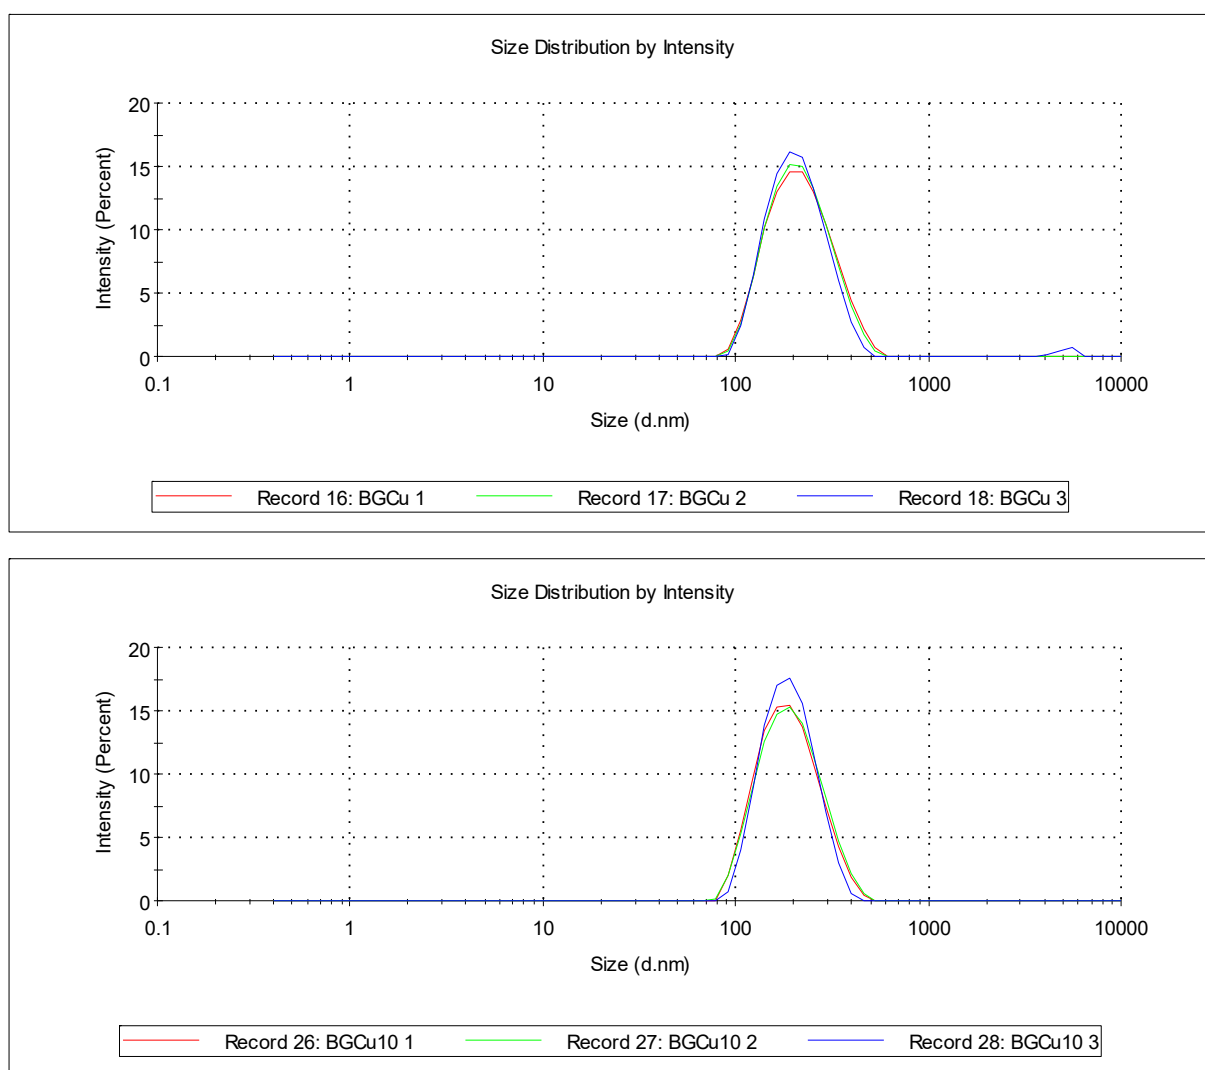

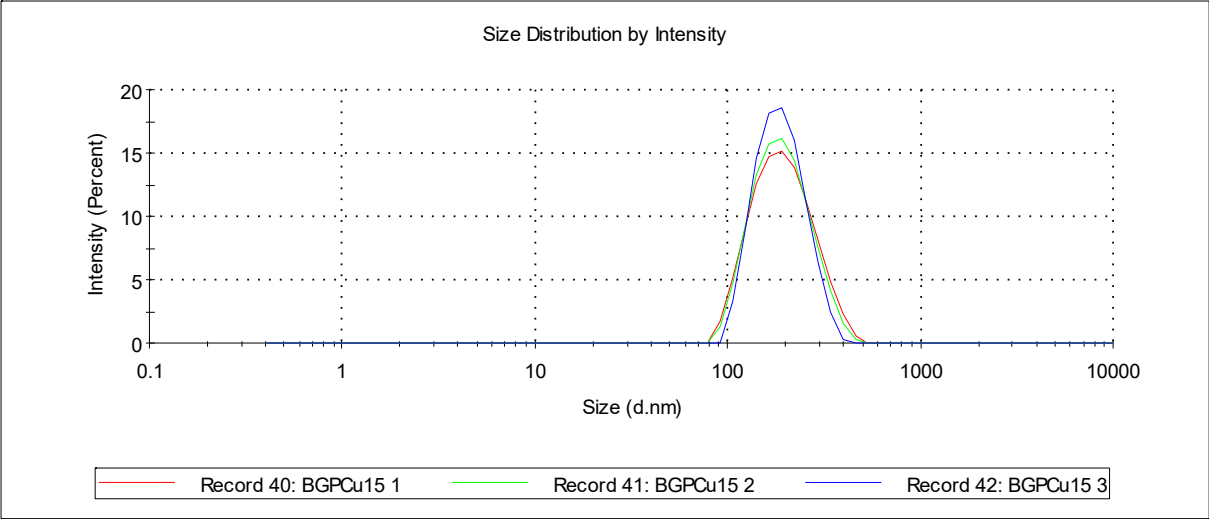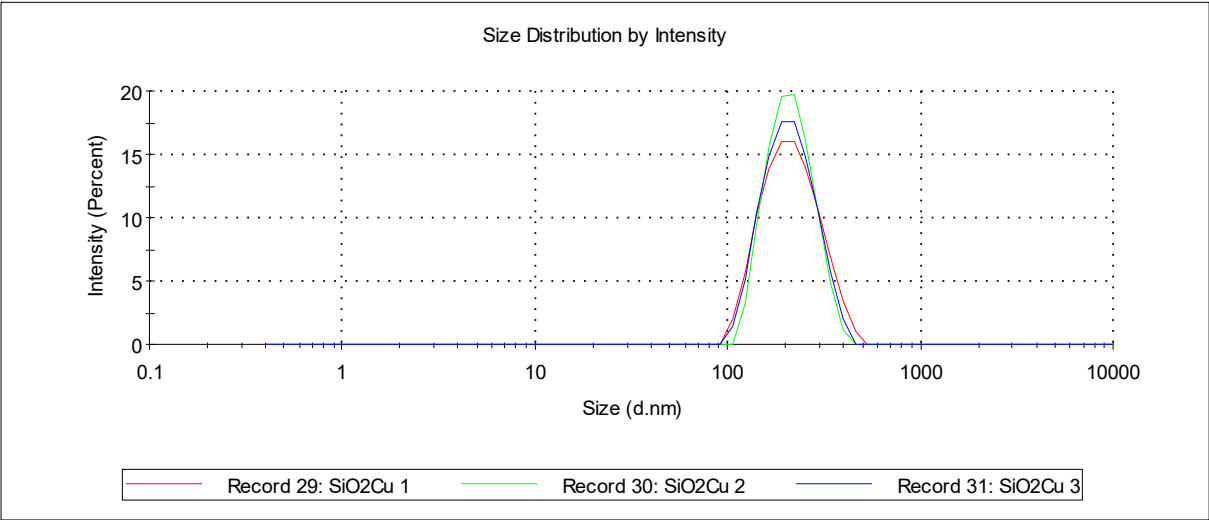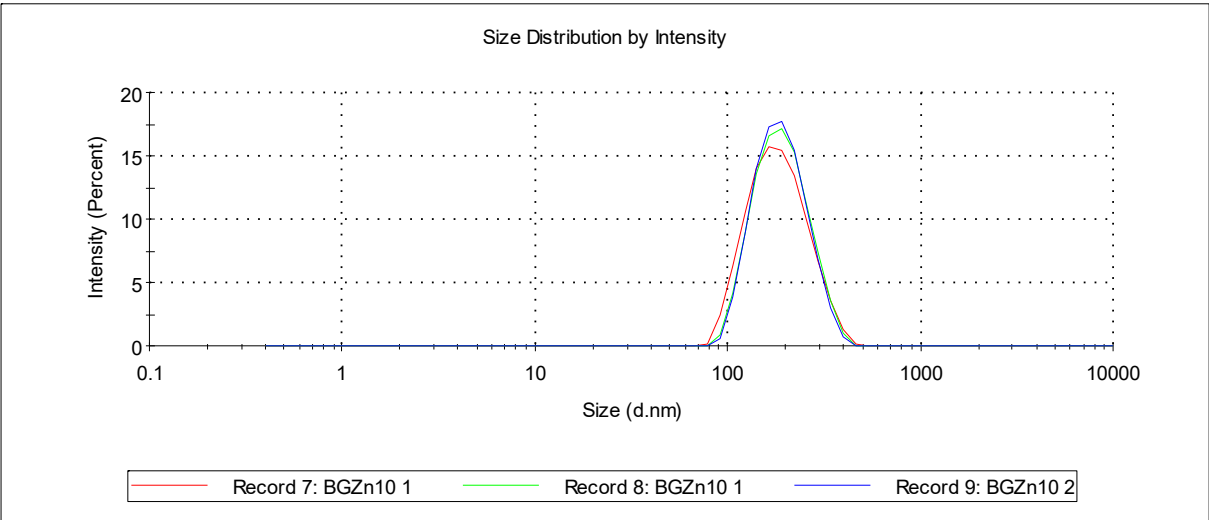

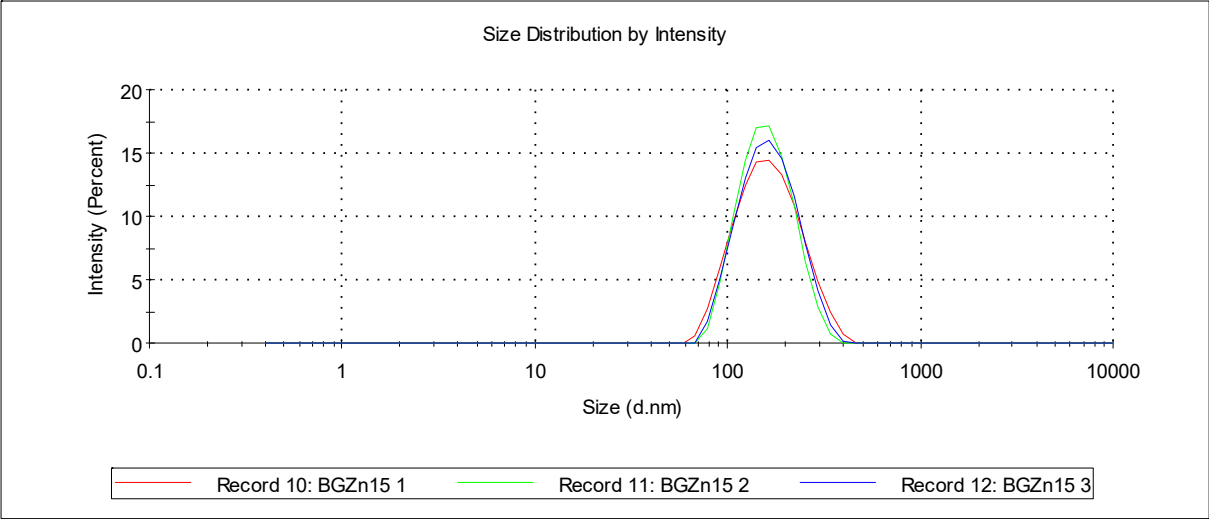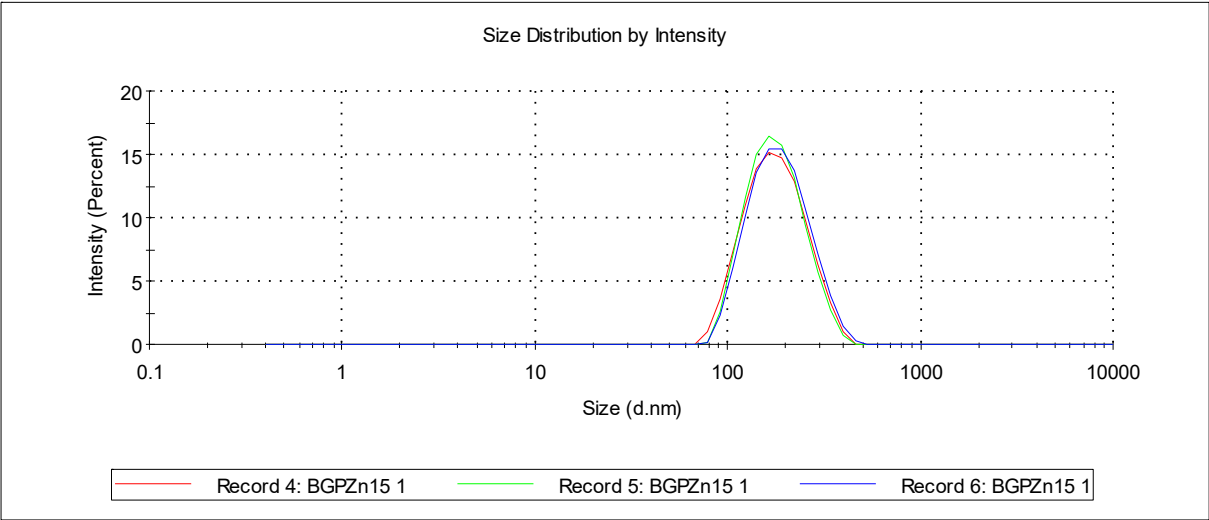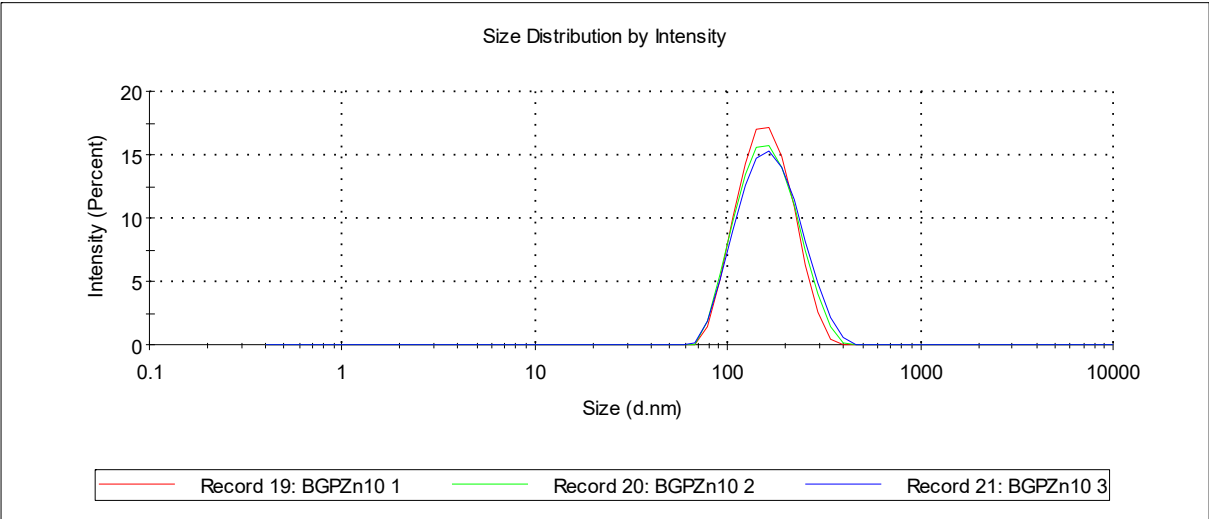

Supplement: s1 [file s1]
